# Supplementary material for: Variations in the charge-transport, nonlinear optical, and electro-optical properties of RM734 due to halogenation: a quantum mechanical study
Source: Royal Society of Chemistry journal article supplement (doi:10.1039/d4nj01702a), 2024-01-01
Supplement: d4nj01702a1.pdf [file d4nj01702a1.pdf]

## Supporting Information

### *Variation in charge transport properties, nonlinear and electro-optics of RM734 due to halogenation: A quantum mechanical study*

Manish Kumar<sup>a</sup>, Mirtunjai Mishra<sup>a</sup>, Devesh Kumar<sup>\*a</sup>, Devendra Singh<sup>\*a</sup>

<sup>a</sup>Department of Physics, School of Physical & Decision Science, Babasaheb Bhimrao Ambedkar University, Lucknow-226025 Uttar Pradesh, India.

\*Corresponding author (E-mail: [dkclcre@yahoo.com](mailto:dkclcre@yahoo.com); [devendras193@gmail.com](mailto:devendras193@gmail.com))

This supplement contains 23 pages, with 2 figures and 11 tables.

#### 1. Optimized structure of RM734 and its halogen derivatives with labels

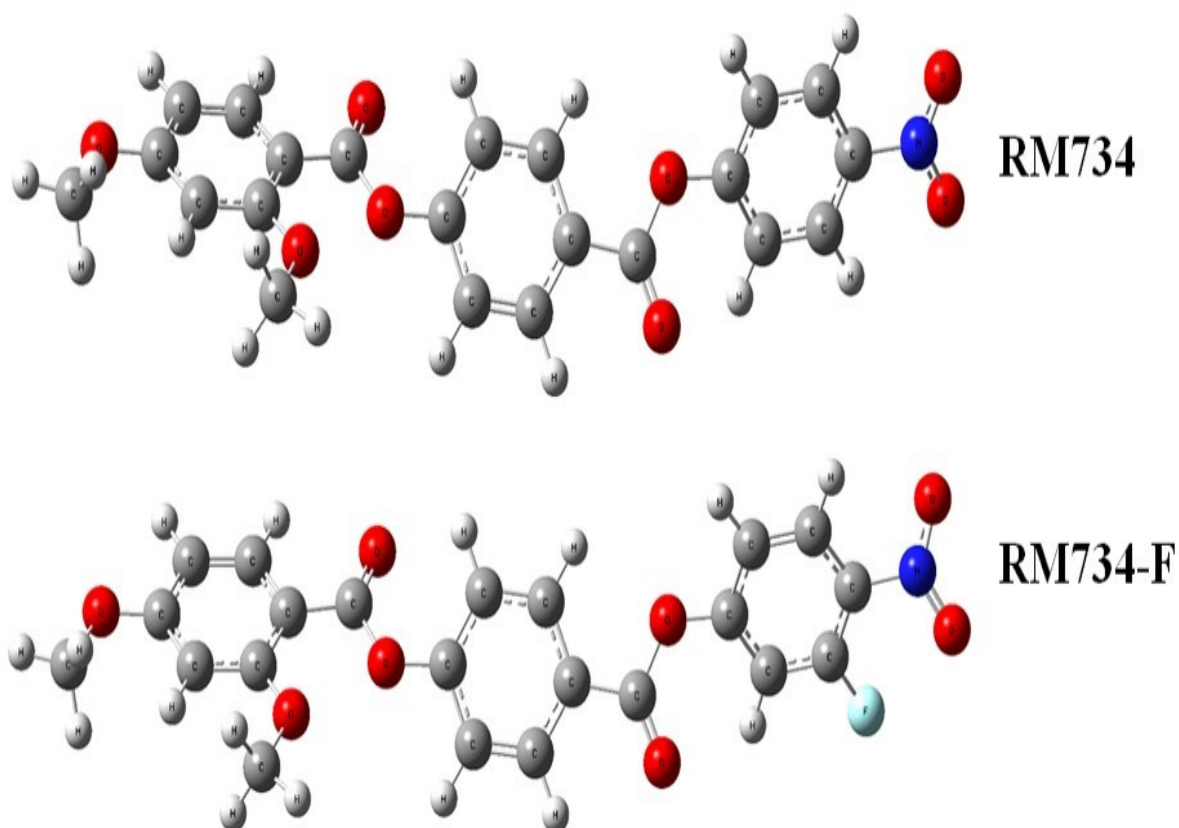

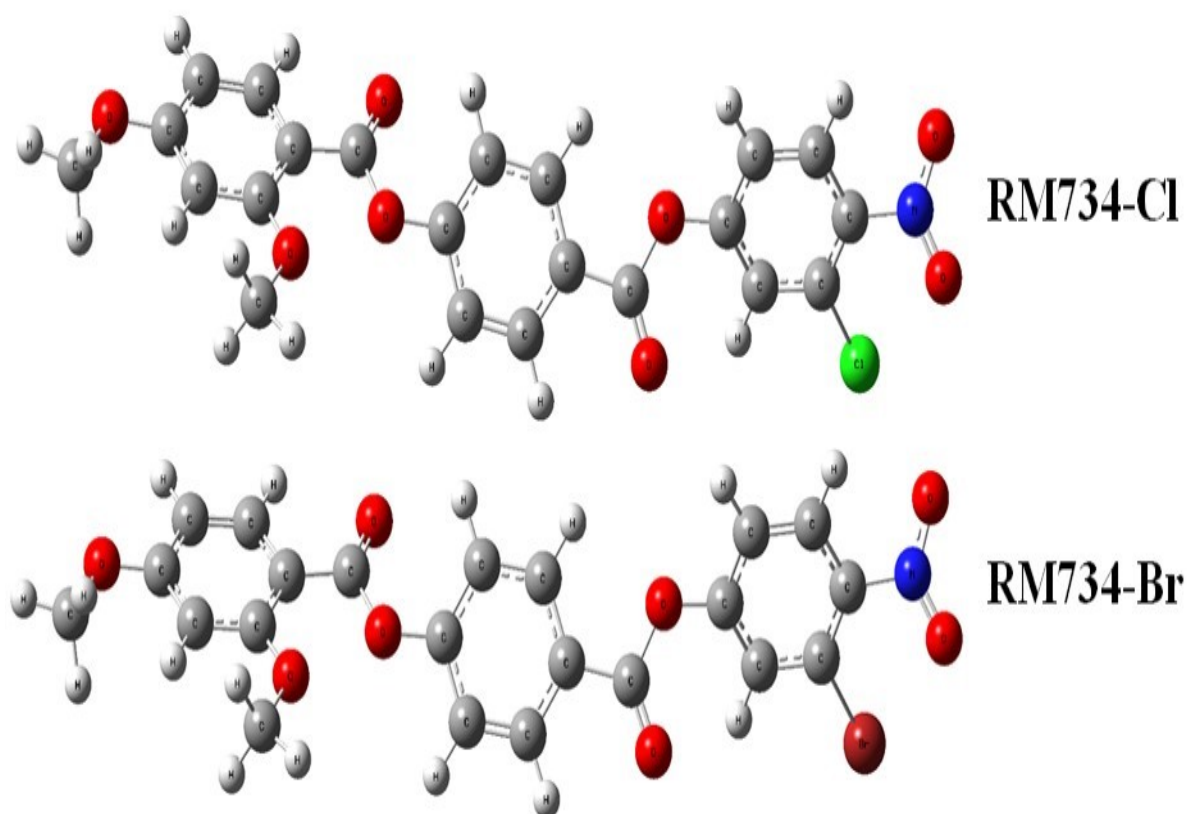

**Figure S1.** Optimized and labeled structure of RM734 liquid crystal molecule and its halogen derivatives.

## 2. Bond alteration

**Table S1:** - Bond length alteration for RM734.

| Atoms  | Bond length (Å) |
|--------|-----------------|
| C1-C2  | 1.4028          |
| C1-C6  | 1.3971          |
| C1-H7  | 1.0777          |
| C2-C3  | 1.4172          |
| C2-O15 | 1.3509          |
| C3-C4  | 1.4078          |
| C3-C20 | 1.4807          |
| C4-C5  | 1.3779          |

|         |        |
|---------|--------|
| C4-H8   | 1.0825 |
| C5-C6   | 1.4011 |
| C5-H9   | 1.0820 |
| C6-O10  | 1.3535 |
| O10-C11 | 1.4238 |
| C11-H12 | 1.0891 |
| C11-H13 | 1.0964 |
| C11-H14 | 1.0965 |
| O15-C16 | 1.4222 |
| C16-H17 | 1.0965 |
| C16-H18 | 1.0965 |
| C16-H19 | 1.0891 |
| C20-O21 | 1.2065 |
| C20-O22 | 1.3728 |
| O22-C23 | 1.3783 |
| C23-C24 | 1.3971 |
| C23-C25 | 1.3968 |
| C24-C26 | 1.3891 |
| C24-H27 | 1.0788 |
| C25-C28 | 1.3851 |
| C25-H29 | 1.0827 |
| C26-C30 | 1.4009 |
| C26-H31 | 1.0815 |
| C28-C30 | 1.4017 |
| C28-H32 | 1.0828 |
| C30-C33 | 1.4793 |
| C33-O34 | 1.2026 |
| C33-O35 | 1.3816 |
| O35-C36 | 1.3807 |
| C36-C37 | 1.3960 |
| C36-C38 | 1.3971 |
| C37-C39 | 1.3872 |

|         |        |
|---------|--------|
| C37-H40 | 1.0826 |
| C38-C41 | 1.3892 |
| C38-H42 | 1.0788 |
| C39-C43 | 1.3922 |
| C39-H44 | 1.0808 |
| C41-C43 | 1.3918 |
| C41-H45 | 1.0809 |
| C43-N46 | 1.4764 |
| N46-O47 | 1.2243 |
| N46-O48 | 1.2246 |

**Table S2:** - Bond length alteration for **RM734-F**.

| Atoms   | Bond length (Å) |
|---------|-----------------|
| C1-C2   | 1.4028          |
| C1-C6   | 1.3971          |
| C1-H7   | 1.0777          |
| C2-C3   | 1.4172          |
| C2-O15  | 1.3509          |
| C3-C4   | 1.4079          |
| C3-C20  | 1.4802          |
| C4-C5   | 1.3778          |
| C4-H8   | 1.0825          |
| C5-C6   | 1.4012          |
| C5-H9   | 1.0820          |
| C6-O10  | 1.3533          |
| O10-C11 | 1.4239          |
| C11-H12 | 1.0890          |
| C11-H13 | 1.0964          |
| C11-H14 | 1.0964          |
| O15-C16 | 1.4224          |
| C16-H17 | 1.0965          |
| C16-H18 | 1.0965          |

|         |        |
|---------|--------|
| C16-H19 | 1.0891 |
| C20-O21 | 1.2064 |
| C20-O22 | 1.3736 |
| O22-C23 | 1.3774 |
| C23-C24 | 1.3973 |
| C23-C25 | 1.3971 |
| C24-C26 | 1.3890 |
| C24-H27 | 1.0788 |
| C25-C28 | 1.3848 |
| C25-H29 | 1.0827 |
| C26-C30 | 1.4011 |
| C26-H31 | 1.0814 |
| C28-C30 | 1.4020 |
| C28-H32 | 1.0827 |
| C30-C33 | 1.4779 |
| C33-O34 | 1.2021 |
| C33-O35 | 1.3847 |
| O35-C36 | 1.3761 |
| C36-C37 | 1.3978 |
| C36-C38 | 1.3933 |
| C37-C39 | 1.3833 |
| C37-H40 | 1.0819 |
| C38-C41 | 1.3875 |
| C38-H42 | 1.0783 |
| C39-C43 | 1.3955 |
| C39-H44 | 1.0811 |
| C41-C43 | 1.3989 |
| C41-F48 | 1.3337 |
| C43-N45 | 1.4717 |
| N45-O46 | 1.2208 |
| N45-O47 | 1.226  |

**Table S3:** - Bond length alteration for **RM734-Cl**.

| Atoms   | Bond length (Å) |
|---------|-----------------|
| C1-C2   | 1.4028          |
| C1-C6   | 1.3971          |
| C1-H7   | 1.0777          |
| C2-C3   | 1.4172          |
| C2-O15  | 1.3509          |
| C3-C4   | 1.4079          |
| C3-C20  | 1.4803          |
| C4-C5   | 1.3778          |
| C4-H8   | 1.0825          |
| C5-C6   | 1.4012          |
| C5-H9   | 1.0820          |
| C6-O10  | 1.3533          |
| O10-C11 | 1.4239          |
| C11-H12 | 1.0891          |
| C11-H13 | 1.0964          |
| C11-H14 | 1.0964          |
| O15-C16 | 1.4223          |
| C16-H17 | 1.0965          |
| C16-H18 | 1.0965          |
| C16-H19 | 1.0891          |
| C20-O21 | 1.2064          |
| C20-O22 | 1.3735          |
| O22-C23 | 1.3775          |
| C23-C24 | 1.3973          |
| C23-C25 | 1.3971          |
| C24-C26 | 1.3890          |
| C24-H27 | 1.0787          |
| C25-C28 | 1.3849          |
| C25-H29 | 1.0827          |
| C26-C30 | 1.4011          |

|          |        |
|----------|--------|
| C26-H31  | 1.0814 |
| C28-C30  | 1.402  |
| C28-H32  | 1.0828 |
| C30-C33  | 1.4780 |
| C33-O34  | 1.2021 |
| C33-O35  | 1.3845 |
| O35-C36  | 1.3779 |
| C36-C37  | 1.3948 |
| C36-C38  | 1.3935 |
| C37-C39  | 1.3837 |
| C37-H40  | 1.0820 |
| C38-C41  | 1.3932 |
| C38-H42  | 1.0781 |
| C39-C43  | 1.3941 |
| C39-H44  | 1.0814 |
| C41-C43  | 1.4005 |
| C41-C148 | 1.7438 |
| C43-N45  | 1.4768 |
| N45-O46  | 1.2194 |
| N45-O47  | 1.2251 |

**Table S4:** - Bond length alteration for **RM734-Br**.

| Atoms  | Bond length (Å) |
|--------|-----------------|
| C1-C2  | 1.4028          |
| C1-C6  | 1.3971          |
| C1-H7  | 1.0777          |
| C2-C3  | 1.4173          |
| C2-O15 | 1.3509          |
| C3-C4  | 1.4079          |
| C3-C20 | 1.4805          |
| C4-C5  | 1.3778          |
| C4-H8  | 1.0825          |

|         |        |
|---------|--------|
| C5-C6   | 1.4012 |
| C5-H9   | 1.0820 |
| C6-O10  | 1.3533 |
| O10-C11 | 1.4239 |
| C11-H12 | 1.0891 |
| C11-H13 | 1.0964 |
| C11-H14 | 1.0965 |
| O15-C16 | 1.4223 |
| C16-H17 | 1.0964 |
| C16-H18 | 1.0965 |
| C16-H19 | 1.0891 |
| C20-O21 | 1.2065 |
| C20-O22 | 1.3730 |
| O22-C23 | 1.3775 |
| C23-C24 | 1.3975 |
| C23-C25 | 1.3973 |
| C24-C26 | 1.3892 |
| C24-H27 | 1.0786 |
| C25-C28 | 1.3847 |
| C25-H29 | 1.0827 |
| C26-C30 | 1.4009 |
| C26-H31 | 1.0814 |
| C28-C30 | 1.4020 |
| C28-H32 | 1.0828 |
| C30-C33 | 1.4780 |
| C33-O34 | 1.2021 |
| C33-O35 | 1.3847 |
| O35-C36 | 1.3785 |
| C36-C37 | 1.3940 |
| C36-C38 | 1.3938 |
| C37-C39 | 1.3840 |
| C37-H40 | 1.0821 |



|          |        |
|----------|--------|
| C38-C41  | 1.3936 |
| C38-H42  | 1.0781 |
| C39-C43  | 1.3945 |
| C39-H44  | 1.0815 |
| C41-C43  | 1.4001 |
| C41-Br48 | 1.9068 |
| C43-N45  | 1.4778 |
| N45-O46  | 1.2194 |
| N45-O47  | 1.2250 |

**Table S5:** - Bond angle alteration for **RM734**.

| Atoms       | Angle (in Degrees) |
|-------------|--------------------|
| A(2,1,6)    | 120.5397           |
| A(2,1,7)    | 119.6515           |
| A(6,1,7)    | 119.8084           |
| A(1,2,3)    | 119.7777           |
| A(1,2,15)   | 121.6226           |
| A(3,2,15)   | 118.5958           |
| A(2,3,4)    | 117.7908           |
| A(2,3,20)   | 127.0539           |
| A(4,3,20)   | 115.1528           |
| A(3,4,5)    | 122.7608           |
| A(3,4,8)    | 117.1526           |
| A(5,4,8)    | 120.0865           |
| A(4,5,6)    | 118.8783           |
| A(4,5,9)    | 121.9658           |
| A(6,5,9)    | 119.1560           |
| A(1,6,5)    | 120.2495           |
| A(1,6,10)   | 123.7720           |
| A(5,6,10)   | 115.9784           |
| A(6,10,11)  | 118.5833           |
| A(10,11,12) | 105.8440           |

|             |          |
|-------------|----------|
| A(10,11,13) | 111.0127 |
| A(10,11,14) | 111.0127 |
| A(12,11,13) | 109.7320 |
| A(12,11,14) | 109.7236 |
| A(13,11,14) | 109.4553 |
| A(2,15,16)  | 119.1963 |
| A(15,16,17) | 111.1840 |
| A(15,16,18) | 111.1973 |
| A(15,16,19) | 105.5069 |
| A(17,16,18) | 109.4770 |
| A(17,16,19) | 109.6960 |
| A(18,16,19) | 109.7057 |
| A(3,20,21)  | 124.1937 |
| A(3,20,22)  | 112.9179 |
| A(21,20,22) | 122.8691 |
| A(20,22,23) | 122.7557 |
| A(22,23,24) | 124.1720 |
| A(22,23,25) | 114.8311 |
| A(24,23,25) | 120.8738 |
| A(23,24,26) | 118.9740 |
| A(23,24,27) | 120.3047 |
| A(26,24,27) | 120.7131 |
| A(23,25,28) | 119.7220 |
| A(23,25,29) | 118.6584 |
| A(28,25,29) | 121.6195 |
| A(24,26,30) | 120.8014 |
| A(24,26,31) | 119.5676 |
| A(30,26,31) | 119.6309 |
| A(25,28,30) | 120.2301 |
| A(25,28,32) | 120.9236 |
| A(30,28,32) | 118.8462 |
| A(26,30,28) | 119.3979 |

|             |          |
|-------------|----------|
| A(26,30,33) | 123.0934 |
| A(28,30,33) | 117.5088 |
| A(30,33,34) | 125.5473 |
| A(30,33,35) | 111.0639 |
| A(34,33,35) | 123.3869 |
| A(33,35,36) | 122.4235 |
| A(35,36,37) | 115.2204 |
| A(35,36,38) | 123.5524 |
| A(37,36,38) | 121.1212 |
| A(36,37,39) | 119.8503 |
| A(36,37,40) | 119.0046 |
| A(39,37,40) | 121.1450 |
| A(36,38,41) | 119.0065 |
| A(36,38,42) | 120.4328 |
| A(41,38,42) | 120.5549 |
| A(37,39,43) | 118.7692 |
| A(37,39,44) | 121.6532 |
| A(43,39,44) | 119.5774 |
| A(38,41,43) | 119.5062 |
| A(38,41,45) | 121.1335 |
| A(43,41,45) | 119.3602 |
| A(39,43,41) | 121.7461 |
| A(39,43,46) | 119.0913 |
| A(41,43,46) | 119.1624 |
| A(43,46,47) | 117.6901 |
| A(43,46,48) | 117.6387 |
| A(47,46,48) | 124.6712 |

**Table S6: - Bond angle alteration for RM734-F.**

| Atoms    | Angle (in Degrees) |
|----------|--------------------|
| A(2,1,6) | 120.5407           |
| A(2,1,7) | 119.6534           |

|             |          |
|-------------|----------|
| A(6,1,7)    | 119.8055 |
| A(1,2,3)    | 119.7724 |
| A(1,2,15)   | 121.6252 |
| A(3,2,15)   | 118.5982 |
| A(2,3,4)    | 117.7978 |
| A(2,3,20)   | 127.0525 |
| A(4,3,20)   | 115.1471 |
| A(3,4,5)    | 122.7539 |
| A(3,4,8)    | 117.1608 |
| A(5,4,8)    | 120.0852 |
| A(4,5,6)    | 118.8799 |
| A(4,5,9)    | 121.9663 |
| A(6,5,9)    | 119.1538 |
| A(1,6,5)    | 120.2517 |
| A(1,6,10)   | 123.7747 |
| A(5,6,10)   | 115.9734 |
| A(6,10,11)  | 118.5984 |
| A(10,11,12) | 105.8397 |
| A(10,11,13) | 111.0098 |
| A(10,11,14) | 111.0055 |
| A(12,11,13) | 109.7325 |
| A(12,11,14) | 109.7261 |
| A(13,11,14) | 109.4663 |
| A(2,15,16)  | 119.1928 |
| A(15,16,17) | 111.1759 |
| A(15,16,18) | 111.1917 |
| A(15,16,19) | 105.5081 |
| A(17,16,18) | 109.4845 |
| A(17,16,19) | 109.7009 |
| A(18,16,19) | 109.7059 |
| A(3,20,21)  | 124.2482 |
| A(3,20,22)  | 112.9056 |

|             |          |
|-------------|----------|
| A(21,20,22) | 122.8258 |
| A(20,22,23) | 122.8050 |
| A(22,23,24) | 124.2185 |
| A(22,23,25) | 114.8057 |
| A(24,23,25) | 120.8548 |
| A(23,24,26) | 118.9856 |
| A(23,24,27) | 120.3027 |
| A(26,24,27) | 120.7035 |
| A(23,25,28) | 119.740  |
| A(23,25,29) | 118.6533 |
| A(28,25,29) | 121.6066 |
| A(24,26,30) | 120.7984 |
| A(24,26,31) | 119.5235 |
| A(30,26,31) | 119.6780 |
| A(25,28,30) | 120.2231 |
| A(25,28,32) | 120.8969 |
| A(30,28,32) | 118.8800 |
| A(26,30,28) | 119.3973 |
| A(26,30,33) | 123.1626 |
| A(28,30,33) | 117.4402 |
| A(30,33,34) | 125.6842 |
| A(30,33,35) | 110.9833 |
| A(34,33,35) | 123.3307 |
| A(33,35,36) | 123.1423 |
| A(35,36,37) | 115.1009 |
| A(35,36,38) | 123.8756 |
| A(37,36,38) | 120.9140 |
| A(36,37,39) | 119.4734 |
| A(36,37,40) | 119.2553 |
| A(39,37,40) | 121.2713 |
| A(36,38,41) | 118.8984 |
| A(36,38,42) | 122.1632 |

|             |          |
|-------------|----------|
| A(41,38,42) | 118.9336 |
| A(37,39,43) | 120.5165 |
| A(37,39,44) | 121.3916 |
| A(43,39,44) | 118.0919 |
| A(38,41,43) | 120.9182 |
| A(38,41,45) | 117.2788 |
| A(43,41,45) | 121.7801 |
| A(39,43,41) | 119.2678 |
| A(39,43,46) | 118.2730 |
| A(41,43,46) | 122.4580 |
| A(43,46,47) | 118.0119 |
| A(43,46,48) | 116.8982 |
| A(47,46,48) | 125.0829 |

**Table S7: - Bond angle alteration for RM734-Cl.**

| Atoms     | Angle (in Degrees) |
|-----------|--------------------|
| A(2,1,6)  | 120.5414           |
| A(2,1,7)  | 119.6520           |
| A(6,1,7)  | 119.8063           |
| A(1,2,3)  | 119.7734           |
| A(1,2,15) | 121.6205           |
| A(3,2,15) | 118.6021           |
| A(2,3,4)  | 117.7937           |
| A(2,3,20) | 127.0624           |
| A(4,3,20) | 115.1412           |
| A(3,4,5)  | 122.7578           |
| A(3,4,8)  | 117.1590           |
| A(5,4,8)  | 120.0831           |
| A(4,5,6)  | 118.8797           |
| A(4,5,9)  | 121.9667           |
| A(6,5,9)  | 119.1536           |

|             |          |
|-------------|----------|
| A(1,6,5)    | 120.2508 |
| A(1,6,10)   | 123.7761 |
| A(5,6,10)   | 115.9729 |
| A(6,10,11)  | 118.5972 |
| A(10,11,12) | 105.8422 |
| A(10,11,13) | 111.0108 |
| A(10,11,14) | 111.0087 |
| A(12,11,13) | 109.7320 |
| A(12,11,14) | 109.7244 |
| A(13,11,14) | 109.4619 |
| A(2,15,16)  | 119.1958 |
| A(15,16,17) | 111.1784 |
| A(15,16,18) | 111.1931 |
| A(15,16,19) | 105.5097 |
| A(17,16,18) | 109.4811 |
| A(17,16,19) | 109.6989 |
| A(18,16,19) | 109.7058 |
| A(3,20,21)  | 124.2324 |
| A(3,20,22)  | 112.9122 |
| A(21,20,22) | 122.8363 |
| A(20,22,23) | 122.8241 |
| A(22,23,24) | 124.2235 |
| A(22,23,25) | 114.7949 |
| A(24,23,25) | 120.8593 |
| A(23,24,26) | 118.9780 |
| A(23,24,27) | 120.3126 |
| A(26,24,27) | 120.7013 |
| A(23,25,28) | 119.7404 |
| A(23,25,29) | 118.6502 |
| A(28,25,29) | 121.6092 |
| A(24,26,30) | 120.8012 |
| A(24,26,31) | 119.5316 |

|             |          |
|-------------|----------|
| A(30,26,31) | 119.6671 |
| A(25,28,30) | 120.2150 |
| A(25,28,32) | 120.9093 |
| A(30,28,32) | 118.8757 |
| A(26,30,28) | 119.4054 |
| A(26,30,33) | 123.1258 |
| A(28,30,33) | 117.4688 |
| A(30,33,34) | 125.7236 |
| A(30,33,35) | 111.0210 |
| A(34,33,35) | 123.2539 |
| A(33,35,36) | 122.6514 |
| A(35,36,37) | 115.4319 |
| A(35,36,38) | 123.4650 |
| A(37,36,38) | 120.9719 |
| A(36,37,39) | 119.2156 |
| A(36,37,40) | 119.4512 |
| A(39,37,40) | 121.3326 |
| A(36,38,41) | 119.6080 |
| A(36,38,42) | 120.7519 |
| A(41,38,42) | 119.6378 |
| A(37,39,43) | 120.4998 |
| A(37,39,44) | 121.2150 |
| A(43,39,44) | 118.2851 |
| A(38,41,43) | 119.5392 |
| A(38,41,48) | 117.0690 |
| A(43,41,48) | 123.3173 |
| A(39,43,41) | 120.1346 |
| A(39,43,45) | 116.3947 |
| A(41,43,45) | 123.4682 |
| A(43,45,46) | 118.0441 |
| A(43,45,47) | 116.5933 |
| A(46,45,47) | 125.3365 |



**Table S8: - Bond angle alteration for RM734-Br.**

| Atoms       | Angle (in Degree) |
|-------------|-------------------|
| A(2,1,6)    | 120.5469          |
| A(2,1,7)    | 119.6418          |
| A(6,1,7)    | 119.8109          |
| A(1,2,3)    | 119.7745          |
| A(1,2,15)   | 121.6153          |
| A(3,2,15)   | 118.6067          |
| A(2,3,4)    | 117.7865          |
| A(2,3,20)   | 127.0645          |
| A(4,3,20)   | 115.1471          |
| A(3,4,5)    | 122.7630          |
| A(3,4,8)    | 117.1608          |
| A(5,4,8)    | 120.0761          |
| A(4,5,6)    | 118.8811          |
| A(4,5,9)    | 121.9644          |
| A(6,5,9)    | 119.1545          |
| A(1,6,5)    | 120.2449          |
| A(1,6,10)   | 123.7733          |
| A(5,6,10)   | 115.9816          |
| A(6,10,11)  | 118.5838          |
| A(10,11,12) | 105.8422          |
| A(10,11,13) | 111.0001          |
| A(10,11,14) | 111.0176          |
| A(12,11,13) | 109.7401          |
| A(12,11,14) | 109.7220          |
| A(13,11,14) | 109.4582          |
| A(2,15,16)  | 119.2022          |
| A(15,16,17) | 111.1934          |
| A(15,16,18) | 111.1946          |
| A(15,16,19) | 105.5066          |
| A(17,16,18) | 109.4830          |

|             |          |
|-------------|----------|
| A(17,16,19) | 109.6845 |
| A(18,16,19) | 109.7043 |
| A(3,20,21)  | 124.2097 |
| A(3,20,22)  | 112.8766 |
| A(21,20,22) | 122.8954 |
| A(20,22,23) | 123.0493 |
| A(22,23,24) | 124.3819 |
| A(22,23,25) | 114.6430 |
| A(24,23,25) | 120.8554 |
| A(23,24,26) | 118.9492 |
| A(23,24,27) | 120.3458 |
| A(26,24,27) | 120.6971 |
| A(23,25,28) | 119.7588 |
| A(23,25,29) | 118.6185 |
| A(28,25,29) | 121.6226 |
| A(24,26,30) | 120.8243 |
| A(24,26,31) | 119.5398 |
| A(30,26,31) | 119.6358 |
| A(25,28,30) | 120.1976 |
| A(25,28,32) | 120.9336 |
| A(30,28,32) | 118.8687 |
| A(26,30,28) | 119.4138 |
| A(26,30,33) | 123.1042 |
| A(28,30,33) | 117.4820 |
| A(30,33,34) | 125.7341 |
| A(30,33,35) | 111.0585 |
| A(34,33,35) | 123.2060 |
| A(33,35,36) | 122.3175 |
| A(35,36,37) | 115.6406 |
| A(35,36,38) | 123.1966 |
| A(37,36,38) | 121.0270 |
| A(36,37,39) | 119.1473 |

|             |          |
|-------------|----------|
| A(36,37,40) | 119.5044 |
| A(39,37,40) | 121.3477 |
| A(36,38,41) | 119.6613 |
| A(36,38,42) | 120.3538 |
| A(41,38,42) | 119.9822 |
| A(37,39,43) | 120.4940 |
| A(37,39,44) | 121.1863 |
| A(43,39,44) | 118.3196 |
| A(38,41,43) | 119.3960 |
| A(38,41,48) | 116.5400 |
| A(43,41,48) | 123.9644 |
| A(39,43,41) | 120.2405 |
| A(39,43,45) | 116.0858 |
| A(41,43,45) | 123.6713 |
| A(43,45,46) | 118.0424 |
| A(43,45,47) | 116.6159 |
| A(46,45,47) | 120.5469 |

### 3. RESP Charges

**Table S9:** - RESP charges on individual atom for RM734, RM734-F, RM734-Cl and RM734-Br.

| <b>Atoms</b> | <b>RM734</b> | <b>RM734-F</b> | <b>RM734-Cl</b> | <b>RM734-Br</b> |
|--------------|--------------|----------------|-----------------|-----------------|
| C01          | -0.46987     | -0.47226       | -0.47185        | -0.47651        |
| C02          | 0.48081      | 0.48231        | 0.48368         | 0.48857         |
| C03          | -0.52709     | -0.53354       | -0.53705        | -0.53277        |
| C04          | 0.06424      | 0.06651        | 0.06723         | 0.06802         |
| C05          | -0.47354     | -0.47456       | -0.47459        | -0.47861        |
| C06          | 0.53581      | 0.53817        | 0.53777         | 0.54153         |
| H07          | 0.19862      | 0.19939        | 0.19855         | 0.19974         |
| H08          | 0.14814      | 0.14714        | 0.14712         | 0.14739         |
| H09          | 0.20098      | 0.2017         | 0.20179         | 0.20265         |

|     |          |          |          |          |
|-----|----------|----------|----------|----------|
| O10 | -0.37761 | -0.37905 | -0.37803 | -0.37883 |
| C11 | -0.01256 | -0.00658 | -0.01049 | -0.01263 |
| H12 | 0.09255  | 0.09105  | 0.09221  | 0.0928   |
| H13 | 0.09255  | 0.09105  | 0.09221  | 0.0928   |
| H14 | 0.09255  | 0.09105  | 0.09221  | 0.0928   |
| O15 | -0.27153 | -0.26751 | -0.26693 | -0.27292 |
| C16 | -0.16403 | -0.17161 | -0.17513 | -0.16911 |
| H17 | 0.12648  | 0.12822  | 0.12927  | 0.12802  |
| H18 | 0.12648  | 0.12822  | 0.12927  | 0.12802  |
| H19 | 0.12648  | 0.12822  | 0.12927  | 0.12802  |
| C20 | 0.93292  | 0.93835  | 0.94295  | 0.9332   |
| O21 | -0.66531 | -0.66392 | -0.66522 | -0.66289 |
| O22 | -0.52567 | -0.52578 | -0.52662 | -0.52413 |
| C23 | 0.45392  | 0.45089  | 0.44853  | 0.4517   |
| C24 | -0.28985 | -0.28713 | -0.28545 | -0.28961 |
| C25 | -0.25681 | -0.2538  | -0.24938 | -0.2521  |
| C26 | -0.07902 | -0.07791 | -0.08008 | -0.07617 |
| H27 | 0.20426  | 0.20568  | 0.20489  | 0.20478  |
| C28 | -0.10259 | -0.09763 | -0.10113 | -0.10013 |
| H29 | 0.19676  | 0.19474  | 0.1936   | 0.19576  |
| C30 | -0.17052 | -0.17877 | -0.18108 | -0.18264 |
| H31 | 0.16133  | 0.15764  | 0.16005  | 0.16104  |
| H32 | 0.16057  | 0.15991  | 0.15982  | 0.1585   |
| C33 | 0.80637  | 0.80514  | 0.82004  | 0.82365  |
| O34 | -0.60707 | -0.60019 | -0.60491 | -0.60405 |
| O35 | -0.46593 | -0.44376 | -0.45138 | -0.45932 |
| C36 | 0.45483  | 0.49967  | 0.40426  | 0.40235  |
| C37 | -0.23453 | -0.28021 | -0.18203 | -0.17919 |
| C38 | -0.2848  | -0.45231 | -0.20432 | -0.15419 |
| C39 | -0.12374 | -0.10878 | -0.21555 | -0.22956 |
| H40 | 0.19558  | 0.20479  | 0.19335  | 0.19452  |
| C41 | -0.10328 | 0.39387  | -0.00849 | -0.11643 |

|                   |          |          |          |          |
|-------------------|----------|----------|----------|----------|
| H42               | 0.22176  | 0.26875  | 0.20772  | 0.1841   |
| C43               | -0.07466 | -0.21807 | 0.01207  | 0.07358  |
| H44               | 0.18545  | 0.20796  | 0.22252  | 0.22541  |
| H45/F45/Cl45/Br45 | 0.17958  | -0.17437 | -0.0634  | -0.01508 |
| N46               | 0.83553  | 0.89433  | 0.82172  | 0.78513  |
| O47               | -0.49684 | -0.49713 | -0.47025 | -0.45178 |
| O48               | -0.49773 | -0.50991 | -0.48874 | -0.48548 |

#### **4. HOME AND LUMO**

**Figure S2.** HOMO and LUMO diagram of RM734 and its halogen derivatives.

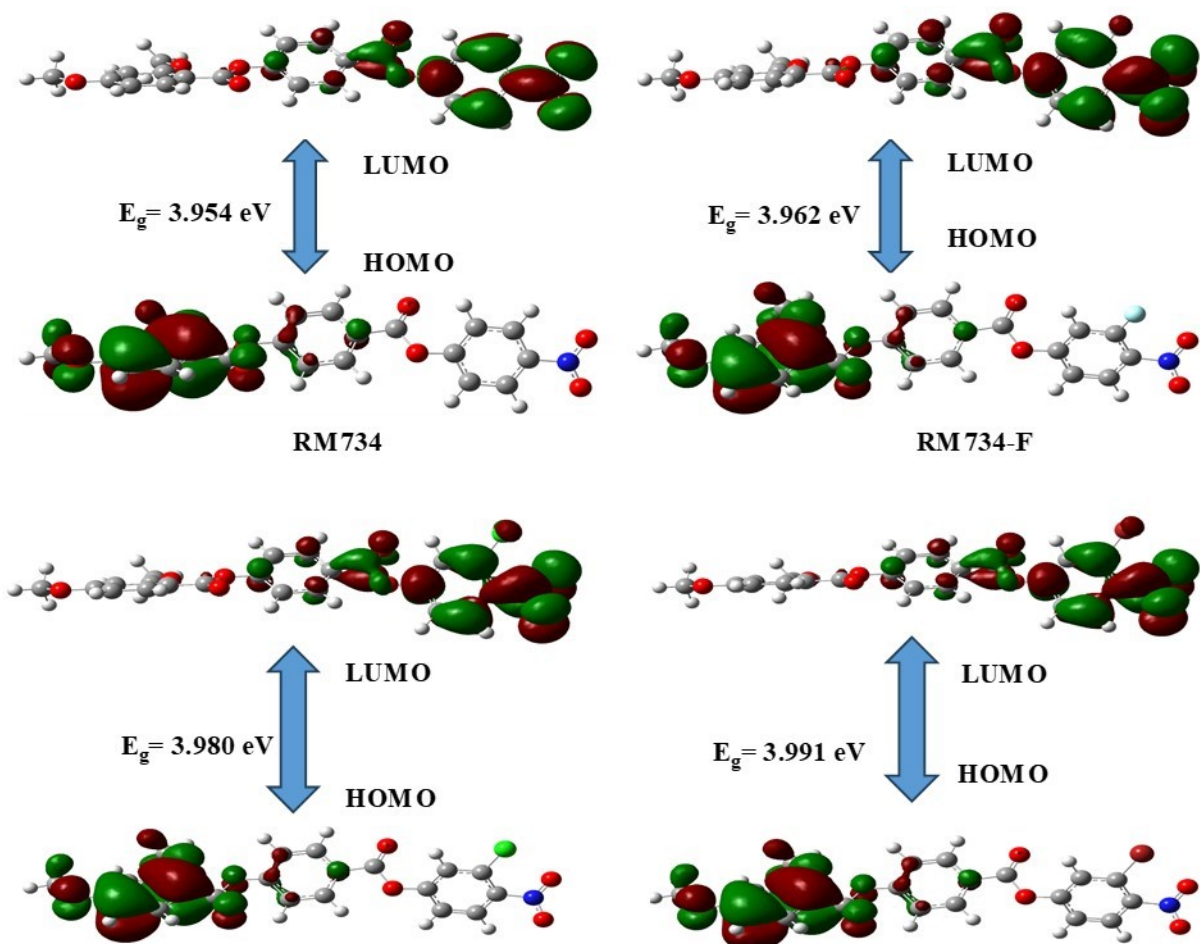

## 5. Nonlinear optical properties of urea and thiourea

For comparison basis, the nonlinear optical properties of urea and thiourea has been also

**Table S10:-** Nonlinear optical properties of urea and thiourea using B3LYP/6-311G\*\*.

calculated using B3LYP/6-311G\*\* and B3LYP/def2-TZVPD methodologies.

| Parameters                                                                     | Urea    | Thiourea |
|--------------------------------------------------------------------------------|---------|----------|
| Anisotropy in Polarizability<br>$(\Delta\alpha) \times 10^{-24}$ esu           | 2.499   | 6.486    |
| First order Hyperpolarizability<br>$(\beta_{total}) \times 10^{-33}$ esu       | 816.876 | 1669.474 |
| Second order Hyperpolarizability<br>$\langle\gamma\rangle \times 10^{-36}$ esu | 1.249   | 2.896    |

**Table S11:-** Nonlinear optical properties of urea and thiourea using B3LYP/def2-TZVPD.

| Parameters                                                                     | Urea    | Thiourea |
|--------------------------------------------------------------------------------|---------|----------|
| Anisotropy in Polarizability<br>$(\Delta\alpha) \times 10^{-24}$ esu           | 2.173   | 4.310    |
| First order Hyperpolarizability<br>$(\beta_{total}) \times 10^{-33}$ esu       | 673.459 | 554.318  |
| Second order Hyperpolarizability<br>$\langle\gamma\rangle \times 10^{-36}$ esu | 3.833   | 11.237   |
